# Supplementary material
Source: Springer Nature journal article supplement (https://www.springermedizin.de/resource/supplementary/12911_2013_730_MOESM5_ESM.pdf/9526230)
Supplement: MOESM5 [file 9526230]

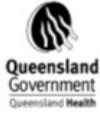

**Metro South Health Service District**  
**Indigenous Health Annual Diabetic Check**  
 Community Health

|             |  |
|-------------|--|
| UR Number   |  |
| Surname     |  |
| Other Names |  |
| DOB         |  |
| Sex         |  |

An \* indicates a mandatory field.

|                                                                                                                   |                                                       |                                                                                                                                                                                                                                                                                              |                                                                                             |
|-------------------------------------------------------------------------------------------------------------------|-------------------------------------------------------|----------------------------------------------------------------------------------------------------------------------------------------------------------------------------------------------------------------------------------------------------------------------------------------------|---------------------------------------------------------------------------------------------|
| Doctor's Name: *                                                                                                  | <input type="text"/>                                  | Nurse: *                                                                                                                                                                                                                                                                                     | <input type="text"/>                                                                        |
| Year of Diagnosis:                                                                                                | <input type="text"/>                                  | Duration of Disease: *                                                                                                                                                                                                                                                                       | <input type="text"/> yrs                                                                    |
| Date:                                                                                                             | <input type="text"/>                                  | Registered with NDSS:                                                                                                                                                                                                                                                                        | <input type="radio"/> Yes <input type="radio"/> No <input checked="" type="radio"/> Missing |
| Consent for health assessment to be used in research: *                                                           | <input type="radio"/> Yes <input type="radio"/> No    | NDSS Membership number if available):                                                                                                                                                                                                                                                        | <input type="text"/>                                                                        |
| How many times have you engaged in moderate physical activity (huff and puff) in the last week (30 mins or more)? | <input type="text"/>                                  |                                                                                                                                                                                                                                                                                              |                                                                                             |
| Comments:                                                                                                         | <input type="text"/>                                  |                                                                                                                                                                                                                                                                                              |                                                                                             |
| Height:                                                                                                           | <input type="text"/> cm                               |                                                                                                                                                                                                                                                                                              |                                                                                             |
| Weight:                                                                                                           | <input type="text"/> kg                               |                                                                                                                                                                                                                                                                                              |                                                                                             |
| BMI:                                                                                                              | <input type="text"/>                                  |                                                                                                                                                                                                                                                                                              |                                                                                             |
| <b>Smoking:</b>                                                                                                   | Never smoked:                                         | <input type="radio"/> Yes <input type="radio"/> No <input checked="" type="radio"/> Missing                                                                                                                                                                                                  |                                                                                             |
|                                                                                                                   | Ex-smoker:                                            | <input type="radio"/> Yes <input type="radio"/> No <input checked="" type="radio"/> Missing                                                                                                                                                                                                  |                                                                                             |
|                                                                                                                   | Current Smoker:                                       | <input type="radio"/> Yes <input type="radio"/> No <input checked="" type="radio"/> Missing                                                                                                                                                                                                  |                                                                                             |
|                                                                                                                   | Wishes to quit:                                       | <input type="radio"/> Yes <input type="radio"/> No <input checked="" type="radio"/> Missing                                                                                                                                                                                                  |                                                                                             |
|                                                                                                                   | Age started:                                          | <input type="text"/>                                                                                                                                                                                                                                                                         |                                                                                             |
|                                                                                                                   | Number of cigarettes / day:                           | <input type="text"/>                                                                                                                                                                                                                                                                         |                                                                                             |
|                                                                                                                   | Pack Years:                                           | <input type="text"/>                                                                                                                                                                                                                                                                         |                                                                                             |
| <b>Alcohol</b>                                                                                                    | Do you drink alcohol?                                 | <input type="radio"/> Yes <input type="radio"/> No <input checked="" type="radio"/> Missing                                                                                                                                                                                                  |                                                                                             |
|                                                                                                                   | If yes, please state if harmful or non-harmful levels | <input type="checkbox"/> > 2 std drinks/day avg; drinks 6-7 days/wk; > 14 std drinks/wk<br><input type="checkbox"/> ≤ 2 std drinks/day, 1-2 alcohol free days/wk; <14 std drinks/wk<br><input type="checkbox"/> > 4 std drinks on any one day<br><input checked="" type="checkbox"/> Missing |                                                                                             |
|                                                                                                                   | Diet Control:                                         | <input type="radio"/> Yes <input type="radio"/> No <input checked="" type="radio"/> Missing                                                                                                                                                                                                  |                                                                                             |

|                             |                                |                                                                                                                                                                                |
|-----------------------------|--------------------------------|--------------------------------------------------------------------------------------------------------------------------------------------------------------------------------|
| <b>Management</b>           | Tablet:                        | <input type="radio"/> Yes <input type="radio"/> No <input checked="" type="radio"/> Missing                                                                                    |
|                             | Insulin:                       | <input type="radio"/> Yes <input type="radio"/> No <input checked="" type="radio"/> Missing                                                                                    |
|                             | Tablet & Insulin:              | <input type="radio"/> Yes <input type="radio"/> No <input checked="" type="radio"/> Missing                                                                                    |
|                             | Dietary Knowledge:             |                                                                                                                                                                                |
|                             | Diabetes Education:            |                                                                                                                                                                                |
|                             | Home Monitoring:               | <input type="radio"/> Yes <input type="radio"/> No <input checked="" type="radio"/> Missing                                                                                    |
|                             | Records Book:                  | <input type="radio"/> Yes <input type="radio"/> No <input checked="" type="radio"/> Missing                                                                                    |
| <b>Blood Pressure:</b>      | B/P LA (systolic / diastolic): | <input type="text"/> / <input type="text"/> <b>Sit</b>                                                                                                                         |
|                             |                                | <input type="text"/> / <input type="text"/> <b>Stand</b>                                                                                                                       |
|                             |                                | <input type="text"/> / <input type="text"/> <b>Lying</b>                                                                                                                       |
|                             | B/P RA (systolic/diastolic):   | <input type="text"/> / <input type="text"/> <b>Sit</b><br><input type="text"/> / <input type="text"/> <b>Stand</b><br><input type="text"/> / <input type="text"/> <b>Lying</b> |
| <b>Foot Screen Risks:</b>   | None:                          | <input type="radio"/> Yes <input type="radio"/> No <input checked="" type="radio"/> Missing                                                                                    |
|                             | Foot Deformity:                | <input type="radio"/> Yes <input type="radio"/> No <input checked="" type="radio"/> Missing                                                                                    |
|                             | Reduce Pulses:                 | <input type="radio"/> Yes <input type="radio"/> No <input checked="" type="radio"/> Missing                                                                                    |
|                             | Past History Foot Ulcer:       | <input type="radio"/> Yes <input type="radio"/> No <input checked="" type="radio"/> Missing                                                                                    |
|                             | Insensitive to Monofilament:   | <input type="radio"/> Yes <input type="radio"/> No <input checked="" type="radio"/> Missing                                                                                    |
|                             | Inability to Selfcare:         | <input type="radio"/> Yes <input type="radio"/> No <input checked="" type="radio"/> Missing                                                                                    |
|                             | Amputation:                    | <input type="radio"/> Yes <input type="radio"/> No <input checked="" type="radio"/> Missing                                                                                    |
| <b>Waverform &amp; ABI:</b> | Waveform LL:                   | <b>DP:</b> <input type="text"/> <b>PT:</b> <input type="text"/>                                                                                                                |
|                             | ABI LL:                        | <input type="text"/>                                                                                                                                                           |
|                             | Waveform RL:                   | <b>DP:</b> <input type="text"/> <b>PT:</b> <input type="text"/>                                                                                                                |
|                             | ABI RL:                        | <input type="text"/>                                                                                                                                                           |
|                             | Glasses Used?                  | <input type="radio"/> Yes <input type="radio"/> No <input checked="" type="radio"/> Missing                                                                                    |
|                             | VA Right:                      | <input type="text"/>                                                                                                                                                           |
|                             | VA Left:                       | <input type="text"/>                                                                                                                                                           |
|                             |                                |                                                                                                                                                                                |

|                              |                                                                                             |                                                                                                        |                             |
|------------------------------|---------------------------------------------------------------------------------------------|--------------------------------------------------------------------------------------------------------|-----------------------------|
| <b>Vision:</b>               | VA Both:                                                                                    | <input type="text"/>                                                                                   |                             |
|                              | Retinal Photograph:                                                                         | <input type="radio"/> Yes <input type="radio"/> No <input checked="" type="radio"/> Missing            |                             |
|                              | Comments:                                                                                   | <div style="border: 1px solid gray; height: 80px;"></div>                                              |                             |
|                              | Ophthalmologist - last visit:                                                               | <input type="text"/>  |                             |
| <b>Pathology:</b>            | Cholesterol / Trig:                                                                         | <input type="text"/> / <input type="text"/>                                                            |                             |
|                              | HDL / LDL:                                                                                  | <input type="text"/> / <input type="text"/>                                                            |                             |
|                              | Total Cholesterol /HDL:                                                                     | <input type="text"/>                                                                                   |                             |
|                              | eGFR:                                                                                       | <input type="text"/>                                                                                   |                             |
|                              | Stage of renal failure:                                                                     | <input type="text"/>                                                                                   |                             |
|                              | ACR                                                                                         | Albuminuria:                                                                                           | <input type="text"/> mg/L   |
|                              |                                                                                             | Creatinine:                                                                                            | <input type="text"/> mmol/L |
|                              |                                                                                             | AC Ratio:                                                                                              | <input type="text"/>        |
| HbA1C:                       | <input type="text"/> %                                                                      |                                                                                                        |                             |
| <b>ACOC:</b>                 | <input type="radio"/> Yes <input type="radio"/> No <input checked="" type="radio"/> Missing |                                                                                                        |                             |
| Comments:                    | <div style="border: 1px solid gray; height: 80px;"></div>                                   |                                                                                                        |                             |
| <b>MEDICAL ASSESSMENT</b>    |                                                                                             |                                                                                                        |                             |
| Medication Review required?  | <input type="radio"/> Yes <input type="radio"/> No <input checked="" type="radio"/> Missing |                                                                                                        |                             |
| Medication Review completed? | <input type="radio"/> Yes <input type="radio"/> No <input checked="" type="radio"/> Missing |                                                                                                        |                             |
| Aspirin:                     | <input type="radio"/> Yes <input type="radio"/> No <input checked="" type="radio"/> Missing |                                                                                                        |                             |
| Insulin:                     | <input type="radio"/> Yes <input type="radio"/> No <input checked="" type="radio"/> Missing |                                                                                                        |                             |
| BP Lowering:                 | <input type="radio"/> Yes <input type="radio"/> No <input checked="" type="radio"/> Missing |                                                                                                        |                             |
| Metformin:                   | <input type="radio"/> Yes <input type="radio"/> No <input checked="" type="radio"/> Missing |                                                                                                        |                             |
| Lipid Lowering Drug:         | <input type="radio"/> Yes <input type="radio"/> No <input checked="" type="radio"/> Missing |                                                                                                        |                             |
| Angina/IHD/CHF:              | <input type="radio"/> Yes <input type="radio"/> No <input checked="" type="radio"/> Missing |                                                                                                        |                             |
| TIA/CVA:                     | <input type="radio"/> Yes <input type="radio"/> No <input checked="" type="radio"/> Missing |                                                                                                        |                             |

|                      |                                                                                             |  |  |
|----------------------|---------------------------------------------------------------------------------------------|--|--|
| Periph Vasc Disease: | <input type="radio"/> Yes <input type="radio"/> No <input checked="" type="radio"/> Missing |  |  |
|----------------------|---------------------------------------------------------------------------------------------|--|--|

**PROBLEM LIST**

|  |  |  |  |
|--|--|--|--|
|  |  |  |  |
|--|--|--|--|

**ACTIONS**

|                  |                                                                                                                                                                                                                                                                                                                                                                                                          |  |  |
|------------------|----------------------------------------------------------------------------------------------------------------------------------------------------------------------------------------------------------------------------------------------------------------------------------------------------------------------------------------------------------------------------------------------------------|--|--|
| Advice:          | <input type="radio"/> Yes <input type="radio"/> No <input checked="" type="radio"/> Missing                                                                                                                                                                                                                                                                                                              |  |  |
|                  | If Yes, what:                                                                                                                                                                                                                                                                                                                                                                                            |  |  |
| New Medications: | <input type="radio"/> Yes <input type="radio"/> No <input checked="" type="radio"/> Missing                                                                                                                                                                                                                                                                                                              |  |  |
|                  | If Yes, what:                                                                                                                                                                                                                                                                                                                                                                                            |  |  |
| Immunisation:    | <input type="radio"/> Yes <input type="radio"/> No <input checked="" type="radio"/> Missing                                                                                                                                                                                                                                                                                                              |  |  |
|                  | If Yes, what:                                                                                                                                                                                                                                                                                                                                                                                            |  |  |
| Referrals:       | <input type="radio"/> Yes <input type="radio"/> No <input checked="" type="radio"/> Missing                                                                                                                                                                                                                                                                                                              |  |  |
|                  | <input type="checkbox"/> Diabetes Educator <input type="checkbox"/> Dietitian <input type="checkbox"/> Endocrinologist <input type="checkbox"/> Exercise Physiologist <input type="checkbox"/> Nephrologist <input type="checkbox"/> Ophthalmologist <input type="checkbox"/> Optometrist<br><input type="checkbox"/> Podiatrist <input type="checkbox"/> Physiotherapist <input type="checkbox"/> Other |  |  |
|                  | If other, please specify:                                                                                                                                                                                                                                                                                                                                                                                |  |  |
| Other Action:    | <input type="radio"/> Yes <input type="radio"/> No <input checked="" type="radio"/> Missing                                                                                                                                                                                                                                                                                                              |  |  |
|                  | If Yes, what:                                                                                                                                                                                                                                                                                                                                                                                            |  |  |

**Sign Off**

**Completed?** (Select this only when Health Check is complete)

**User Name**

**Password**

**Save**

Health Check Completed by:

Signed:

Date:
